# Supplementary material for: Older adults’ reporting of specific sedentary behaviors: validity and reliability
Source: PubMed Central journal article supplement (PMC4223385; doi:10.1186/1471-2458-14-734), 2014-07-21
Supplement: 1471-2458-14-734-S1.pdf [file 1471-2458-14-734-S1.pdf]

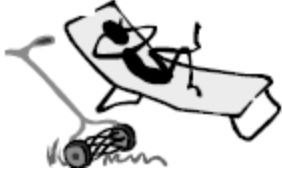

## **Time spent sitting**

The following questions are about the time you spent sitting at work, at home, while studying or during leisure in the last 7 days. This includes time you sat behind a desk, received visitors, reading, viewing television, and during motorized transport.

**1a** During the last seven days, on how many days did you use public transport (train, bus or tram)?

\_\_\_\_\_ days per week

No (*skip to question 1c*)

**1b** How much time did you usually spend on one of those days using public transport?

\_\_\_\_\_ hours \_\_\_\_\_ minutes per day

**1c** During the last seven days, on how many days were you the driver of a motorized vehicle (e.g. moped, moto, car)?

\_\_\_\_\_ days per week

No (*skip to question 1e*)

**1d** How much time did you usually spend on one of those days driving a motorized vehicle?

\_\_\_\_\_ hours \_\_\_\_\_ minutes per day

**1e During the last seven days, on how many days were you a passenger in a motorized vehicle?**

\_\_\_\_\_ days per week

No (*skip to question 1g*)

**1f How much time did you usually spend on one of those days being a passenger in a motorized vehicle?**

\_\_\_\_ hours \_\_\_\_ minutes per day

**1g During the last seven days, on how many days did you use a computer?**

\_\_\_\_\_ days per week

No (*skip to question 1i*)

**1h How much time did you usually spend on one of those days using a computer?**

\_\_\_\_ hours \_\_\_\_ minutes per day

**1i During the last seven days, on how many days did you read (book, newspaper, magazine)?**

\_\_\_\_\_ days per week

No (*skip to question 1k*)

**1j How much time did you usually spend on one of those days reading?**

\_\_\_\_\_ hours \_\_\_\_ minutes per day

**1k During the last seven days, on how many days did you watch television?**

\_\_\_\_\_ days per week

*O No (skip to question 1m)*

**1l How much time did you usually spend on one of those days watching television?**

\_\_\_\_\_ hours \_\_\_\_ minutes per day

**1m During the last seven days, on how many days did you engage in sitting hobbies such as handicraft, playing cards, etc.?**

\_\_\_\_\_ days per week

*O No (skip to question 1o)*

**1n How much time did you usually spend on one of those days in sitting hobbies?**

\_\_\_\_\_ hours \_\_\_\_ minutes per day

**1o During the last seven days, on how many days did you make a phone call while sitting?**

\_\_\_\_\_ days per week

*O No (skip to question 1q)*

**1p How much time did you usually spend on one of those days making a phone call while sitting?**

\_\_\_\_ hours \_\_\_\_ minutes per day

**1q During the last seven days, on how many days did you chat with friends or acquaintances (not on the phone) or listened to music while sitting?**

\_\_\_\_\_ days per week

*O No (skip to question 1s)*

**1r How much time did you usually spend on one of those days chatting with friends or acquaintances (not on the phone) or listening to music while sitting?**

\_\_\_\_ hours \_\_\_\_ minutes per day

**1s During the last seven days, on how many days did you do household chores, such as ironing, folding laundry or preparing a meal, while sitting?**

\_\_\_\_\_ days per week

*O No (skip to question 1u)*

**1t How much time did you usually spend on one of those days doing household chores while sitting?**

\_\_\_\_ hours \_\_\_\_ minutes per day

**1u** During the last seven days, how much time did you usually spend per day eating while sitting?

\_\_\_\_ hours \_\_\_\_ minutes per day
